# Supplementary material for: Identification and Characterization of a Suite of Tumor Targeting Peptides for Non-Small Cell Lung Cancer
Source: PubMed Central journal article supplement — Sci Rep. 2014 Mar 27;4:4480. doi: 10.1038/srep04480 (PMC3967199; doi:10.1038/srep04480), 2014-03-27
Supplement: srep04480-s1.pdf [file srep04480-s1.pdf]

**Supplemental Informations for Identification and Characterization of a Suite of Tumor  
Targeting Peptides for Non-Small Cell Lung Cancer**

Michael J. McGuire<sup>1,4</sup>, Bethany Powell Gray<sup>1,4</sup>, Shunzi Li<sup>1,4</sup>, Dorothy Cupka<sup>1,4</sup>, Lauren Averett Byers<sup>6</sup>, Lei Wu<sup>1,4</sup>, Shaghayegh Rezaie<sup>1,4</sup>, Ying-Horng Liu<sup>1,4</sup>, Naveen Pattisapu<sup>1,4</sup>, James Issac<sup>1,4</sup>, Tsukasa Oyama<sup>1</sup>, Lixia Diao<sup>6</sup>, John V. Heymach<sup>6</sup>, Xian-Jin Xie<sup>3,4</sup>, John D. Minna<sup>1,2,4,5</sup>, and Kathlynn C. Brown<sup>1,4</sup>

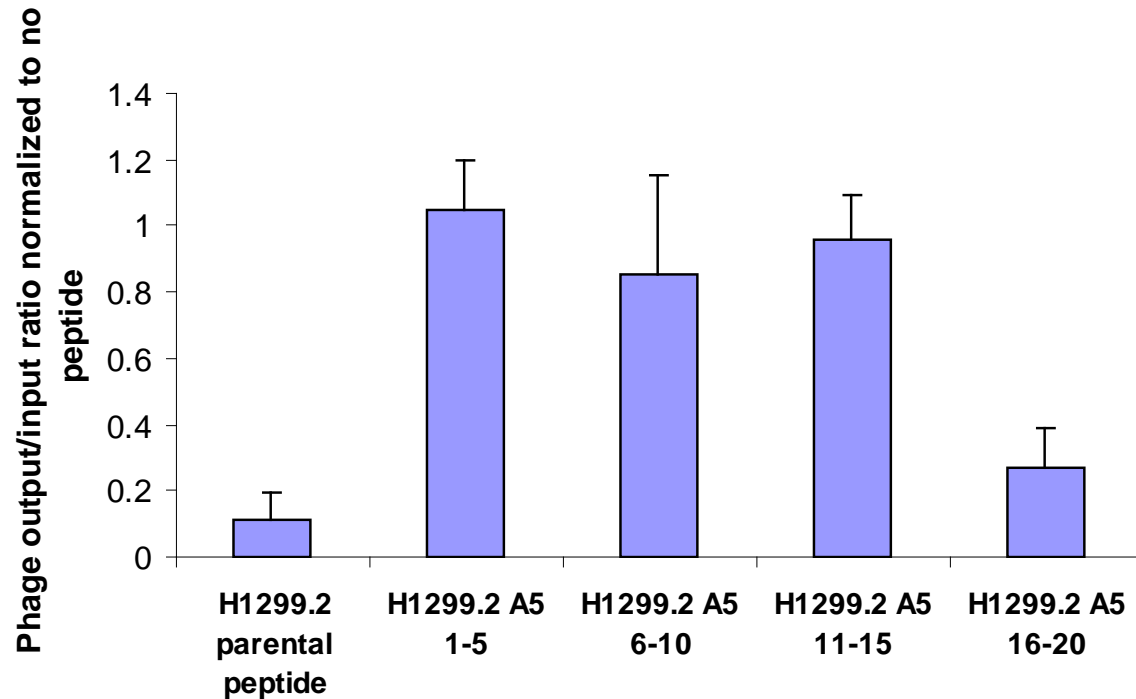

**Supplemental Figure S1. The H1299.2 peptide can be truncated to a 15-mer with no loss of binding activity.** A. A series of peptides were synthesized in which 5-amino acid blocks were replaced with alanine residues. The ability of the peptides to block uptake of H1299.2 phage as described in the text. Changing the c-terminal 5 amino acids to alanine does not affect the ability of the peptide to compete with phage binding while the other 3 peptides are nonfunctional. The half maximal binding affinity of the 15-mer is the same as the full length parental peptide.

## No primary antibody control

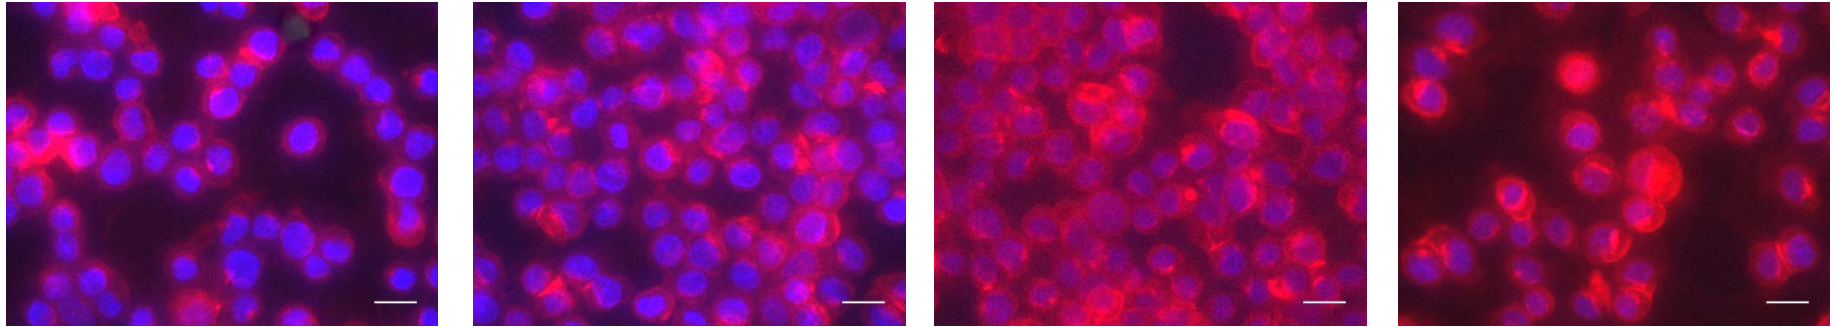

## Mouse Anti-phage antibody

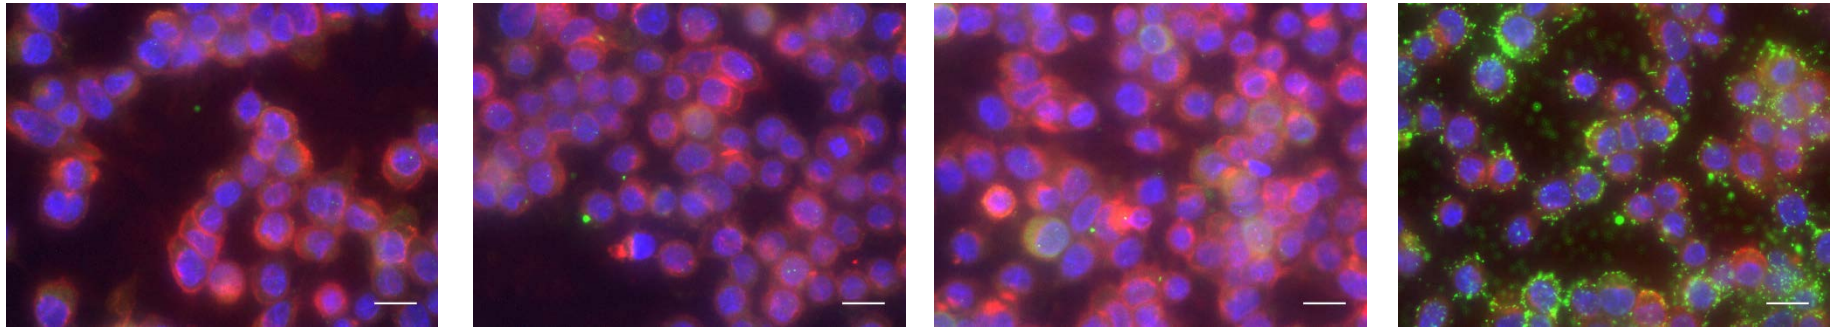

No phage

Control phage

H2009.1 phage

H460.1 phage

**Supplementary Figure S2. The H460.1 phage displays similar binding patterns as the free H460.1 tetrameric peptide.** MCF-7 cells were seeded on 8 well chamber slide and cultured overnight. Cell were incubated for 10 minutes with the indicated phage clone at  $1 \times 10^8$  cfu/ml or without phage. Unbound phage were removed and cells were washed 4 times with PBS+0.1%BSA followed by 2 HCl-Glycine rinses. Cells were washed with PBS and fixed in PBS-buffered formalin. Samples were permeabilized and treated with 2% goat serum and 2% BSA in PBS containing 0.1% Triton X-100 (Perm and Block Buffer). After 10 minutes in Perm and Block Buffer, samples were incubated for 30 min as indicated with 1:100 dilution of mouse anti-phage antibody (in-house generated antibody). Samples were washed 3 times with PBS +0.1% BSA (5 min each) prior to incubation (30 min) with 1:200 dilution of goat anti-mouse IgG-Alexafluor 488 conjugate (Invitrogen) in Perm and Block Buffer. Samples were washed 3 times with PBS+0.1% BSA followed by 2 PBS only washes. Cells were counterstained with 10 $\mu$ g/ml wheat germ agglutinin-Texas Red conjugate for 10 min followed by 2 PBS rinses. Samples were overlaid with Vectashield + DAPI prior to fluorescence microscopy. Scale bars represent 20 microns.

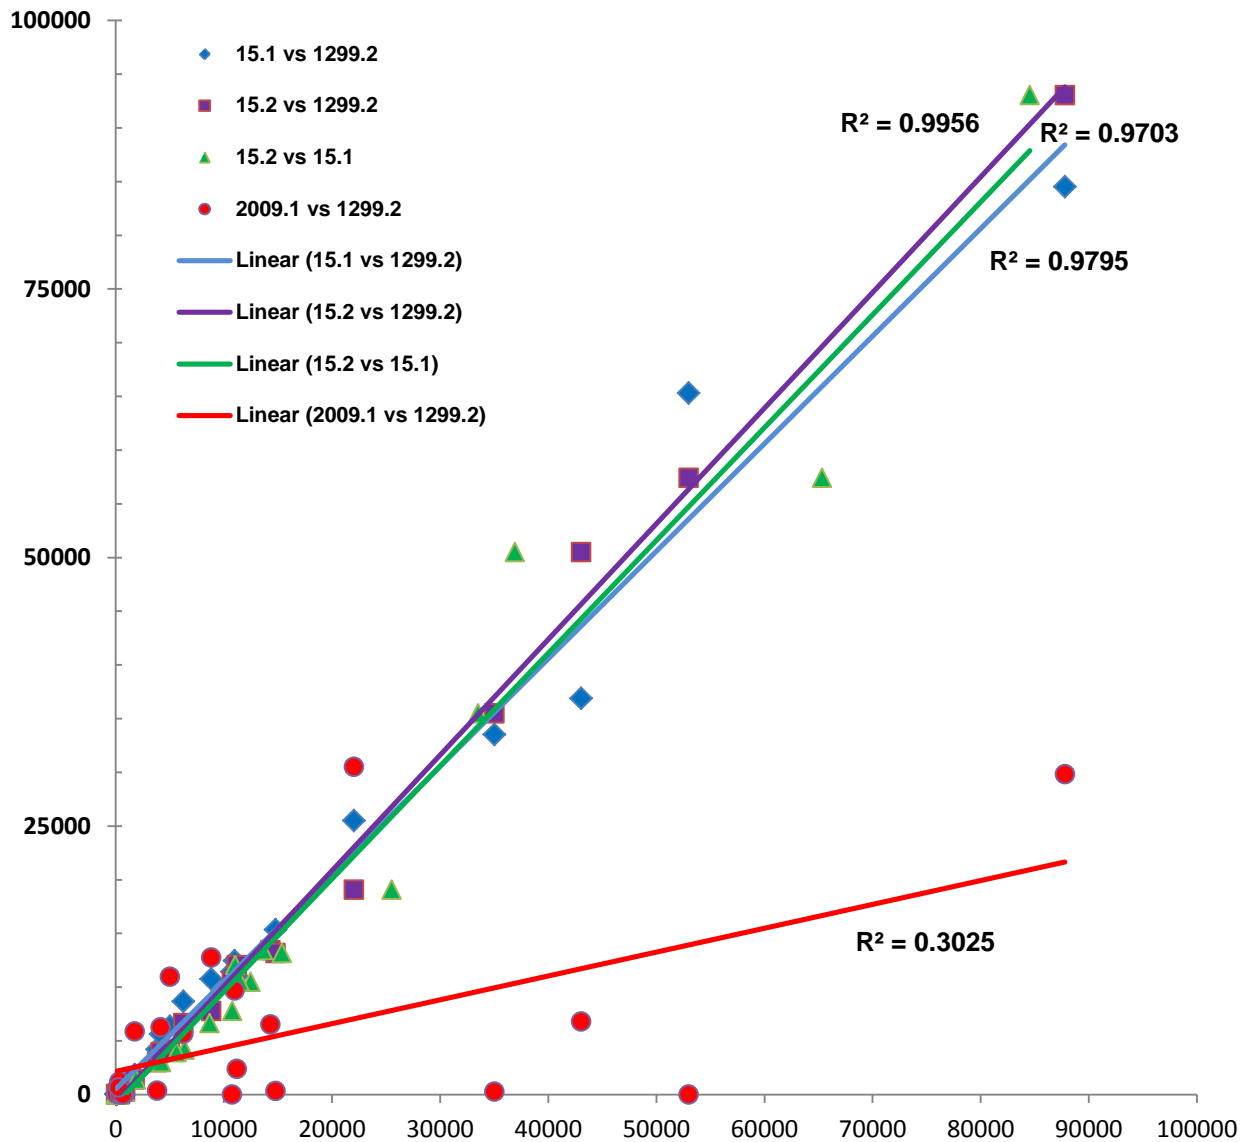

**Supplementary Figure S3.** There is a linear correlation between of binding scores of the triplet peptide group, H1299.2, HCC15.1, and HCC15.2. Binding scores were generated as described in the manuscript.  $R^2$  values are indicated.

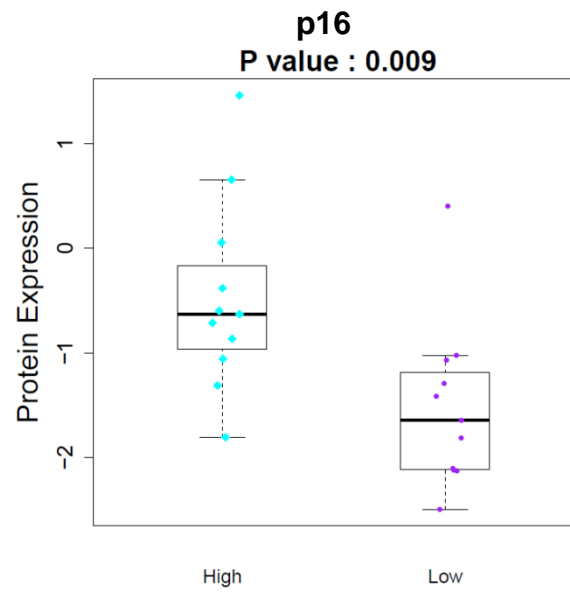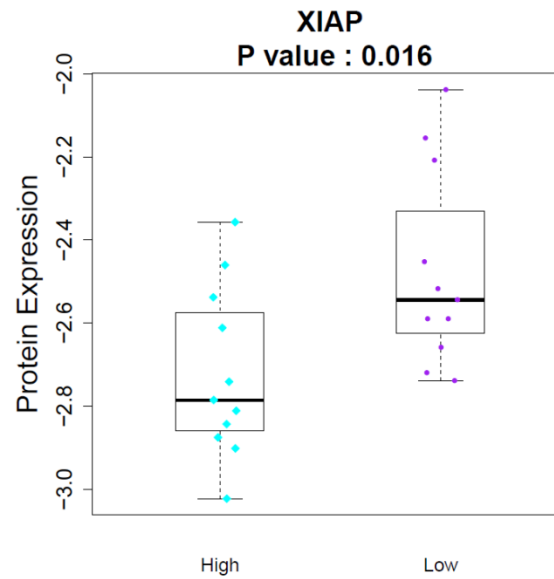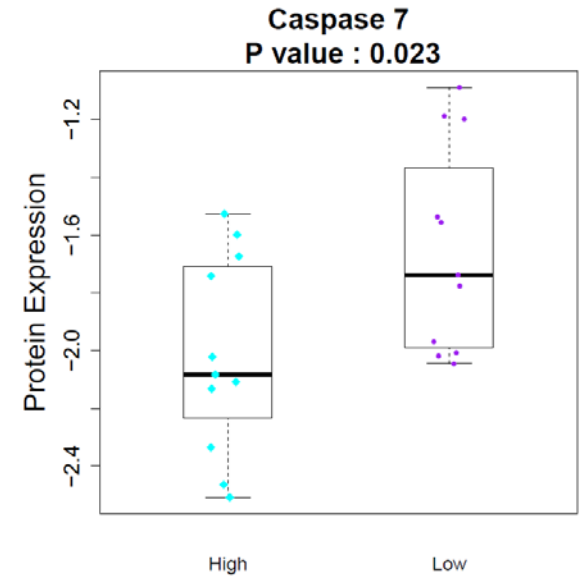

**Supplemental Figure S4. Peptide Binding of the triplet cluster correlates to expression levels of three proteins.** Cells were dichotomized into high and low binders of H1299.2, HCC15.1, and HCC15.2 using a cell binding score as 5000 as a benchmark and compared to expression levels of 200 proteins analyzed by RPPA (t test analysis)

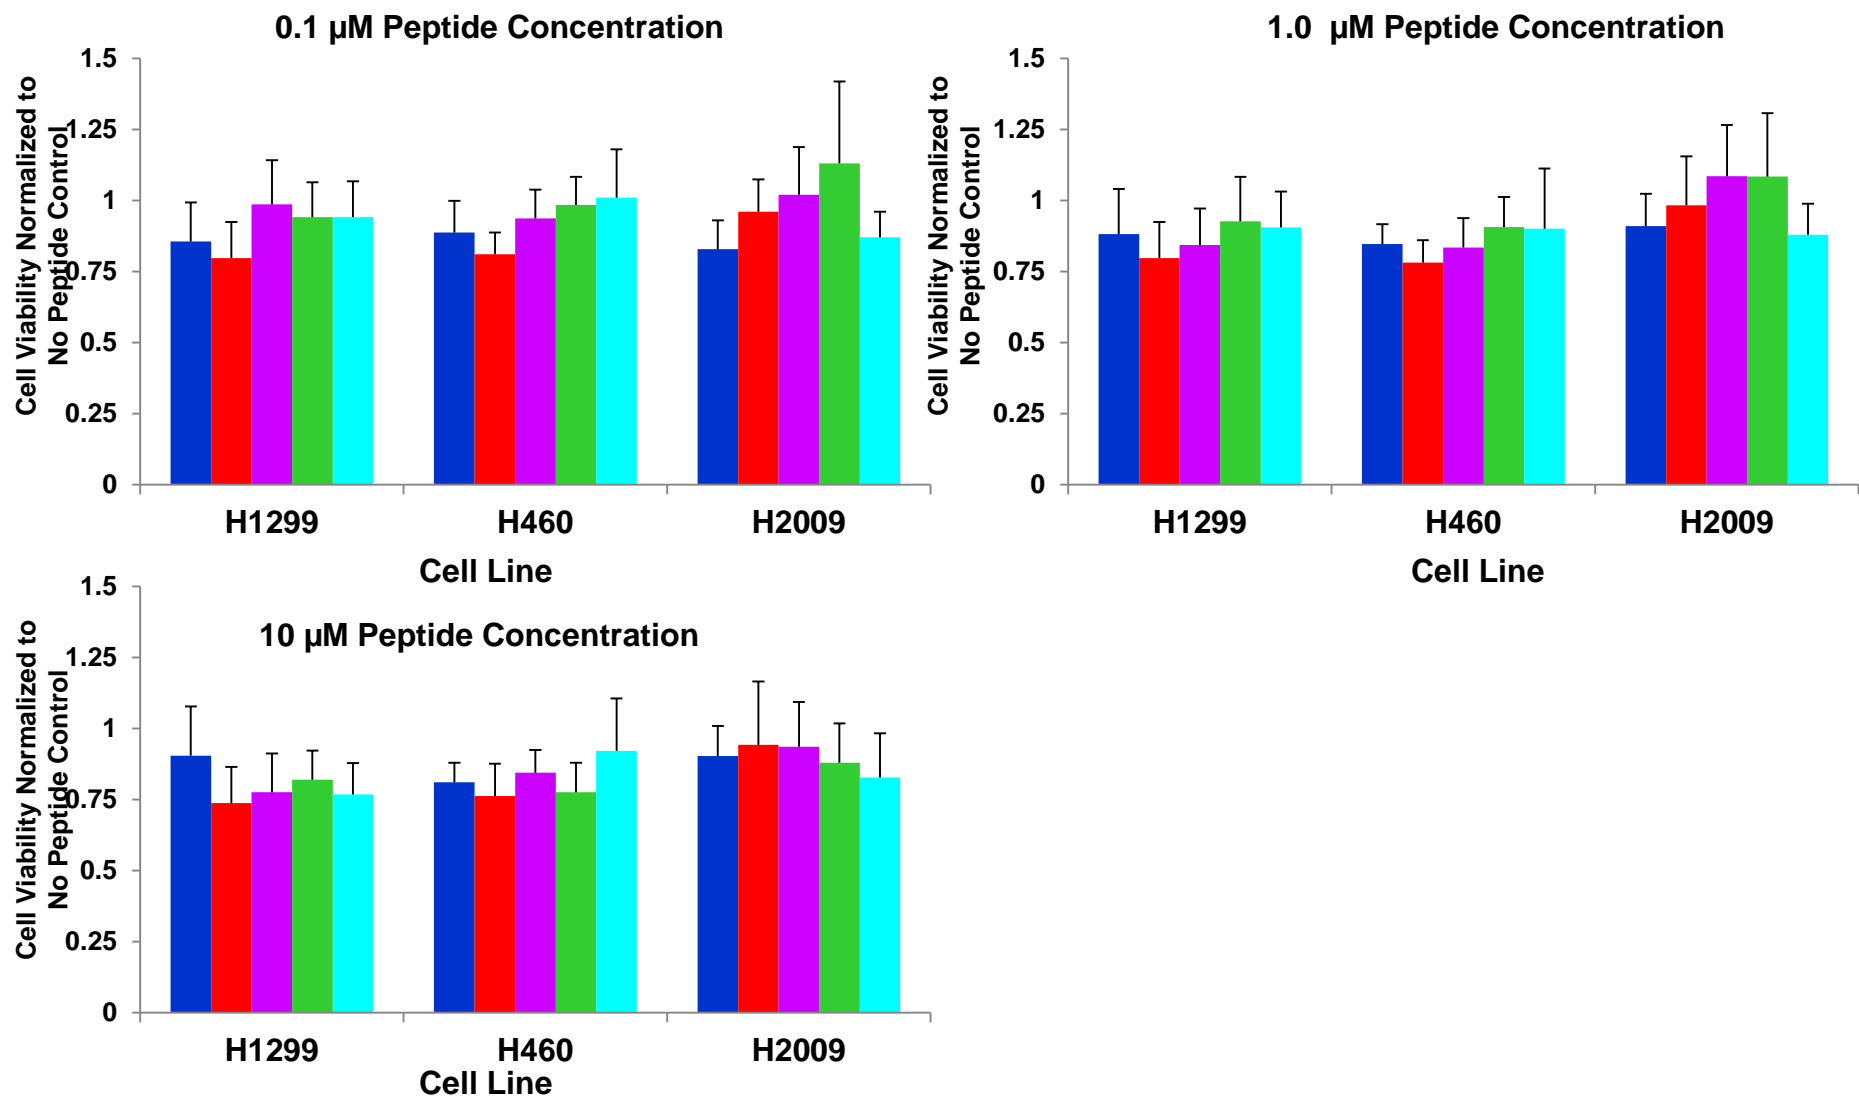

**Supplemental Figure S5. The isolated NSCLC-binding peptides do not affect cell growth.** Cells were plated in 96 well plates at concentrations of 1,000 cells/well (460 and 1299 cells) or 2,000 cells per well (2009 cells). Peptides were added to the cell media 24 h later at the indicated concentration. Cell viability was determined using the CellTiter-Glo<sup>®</sup> Luminescent Assay per manufacturer's protocol at 72 hrs.



**Table S-II Selectivity of Phage Clones on Other Cancer Cell Lines**

|                      | H1299.1    | H1299.2     | H2009.1      | H460.1       | A549.1      | HCC15.1     | HCC15.2     | HCC95.1     | H1155.1     | H1155.2     | H661.1        |
|----------------------|------------|-------------|--------------|--------------|-------------|-------------|-------------|-------------|-------------|-------------|---------------|
| MCF7(breast)         | 1.5 ± 1.1  | 2.6 ± 2.3   | 15 ± 3.8     | 530 ± 170    | 50 ± 15     | 4.2 ± 3     | 1.7 ± 0.33  | 1.1 ± 0.14  | 2.6 ± 0.55  | 5.6 ± 2.1   | 2.9 ± 0.97    |
| T47D (breast)        | 10 ± 2.2   | 12 ± 2.3    | 0.57 ± 0.038 | 0.82 ± 0.024 | 1.2 ± 0.19  | 24 ± 6.0    | 14 ± 3.1    | 2.7 ± 1.8   | 5.1 ± 0.71  | 4.7 ± 1.3   | 4.3           |
| MDA-MB-468 (breast)  | 1.5 ± 0.24 | 2.6 ± 0.97  | 25 ± 7.6     | 1.9 ± 0.22   | 3.8 ± 1.1   | 0.59 ± 0.42 | 0.83 ± 0.54 | ND          | 0.25 ± 0.13 | 0.78 ± 0.60 | ND            |
| MDA-MB-231 (breast)  | 28 ± 13.3  | 16 ± 6.1    | 1 ± 0.23     | 2.4 ± 1.1    | 0.94 ± 0.26 | 170 ± 78    | 150 ± 38    | 1.4 ± 0.91  | 3.3 ± 1.1   | 8.5 ± 1.9   | 3.3 ± 1.6     |
| PC3 (prostate)       | 4.2 ± 1.6  | 12 ± 2.4    | 0.8 ± 0.26   | 1.7 ± 0.56   | 0.51 ± 0.13 | 6.6 ± 0.87  | 5.1 ± 0.8   | 6.7 ± 4.2   | 5.1 ± 4     | 11 ± 4.7    | 0.71 ± 0.17   |
| LnCap (carcinoma)    | 1.8 ± 1.1  | 0.31 ± 0.27 | 1.3 ± 0.71   | 0.44 ± 0.17  | 0.13 ± 0.06 | 1.9 ± 1.2   | 4.8 ± 1.3   | 2.3 ± 1.4   | 7.8 ± 3.7   | 23 ± 0.7    | 0.86 ± 0.51   |
| SCOV3 (ovarian)      | 2 ± 0.59   | 6.1 ± 3.4   | 7.7 ± 4.9    | 1.9 ± 0.52   | 0.97 ± 0.37 | 2.7 ± 1.1   | 51 ± 17     | 0.78 ± 0.44 | 1.1 ± 0.23  | 2.3 ± 1.1   | 0.21 ± 0.0088 |
| MiaPaCa (pancreatic) | 20 ± 5.3   | 90 ± 20     | 1.6 ± 1      | 0.53 ± 0.29  | 0.89 ± 0.29 | 3.7 ± 1.9   | 35 ± 4.1    | 0.57 ± 0.16 | 0.44 ± 0.29 | 1.2 ± 0.41  | 1.7 ± 0.97    |
| Panc1 (pancreatic)   | 19 ± 6.6   | 44 ± 12     | 1.4 ± 0.5    | 0.85 ± 0.28  | 0.66 ± 0.33 | 9.0 ± 3.0   | 15 ± 3.5    | 0.77 ± 0.23 | 2.0 ± 0.40  | 2.2 ± 0.40  | 1.4 ± 0.51    |
| SW480 (colorectal)   | 4.5 ± 2.2  | 9.1 ± 2     | 6.6 ± 3.3    | 2.1 ± 0.55   | 3.5 ± 0.75  | 61 ± 2.7    | 120 ± 12    | 0.82 ± 0.39 | 2 ± 0.73    | 14 ± 1.3    | 0.77 ± 0.38   |
| HUH7 (liver)         | 200 ± 60   | 290 ± 65    | 2.9 ± 1.6    | 330 ± 95     | 250 ± 72    | 210 ± 53    | 140 ± 40    | 2.2 ± 0.53  | 3.3 ± 2.1   | 2.1 ± 0.86  | 2.2 ± 0.67    |

Total Number of Cell Lines  
with Selectivity ≥ 20

3                      3                      1                      2                      2                      3                      5                      0                      0                      1                      0

Selectivity ≥ 20 are indicated  
in red for clarity  
Errors are represented as  
S.E.M.



**Table S-III Binding Analysis of Peptides**

**H1299.2 Monomer**

|                                                          | Normalized Binding       |
|----------------------------------------------------------|--------------------------|
| log(inhibitor) vs. normalized response -- Variable slope |                          |
| Best-fit values                                          |                          |
| LogIC50                                                  | -7.687                   |
| HillSlope                                                | -1.251                   |
| IC50                                                     | 2.057E-08                |
| Std. Error                                               |                          |
| LogIC50                                                  | 0.1235                   |
| HillSlope                                                | 0.3508                   |
| 95% Confidence Intervals                                 |                          |
| LogIC50                                                  | -7.954 to -7.420         |
| HillSlope                                                | -2.009 to -0.4933        |
| IC50                                                     | 1.113e-008 to 3.801e-008 |
| Goodness of Fit                                          |                          |
| Degrees of Freedom                                       | 13                       |
| R square                                                 | 0.8755                   |
| Absolute Sum of Squares                                  | 2506                     |
| Sy.x                                                     | 13.88                    |
| Number of points                                         |                          |
| Analyzed                                                 | 15                       |

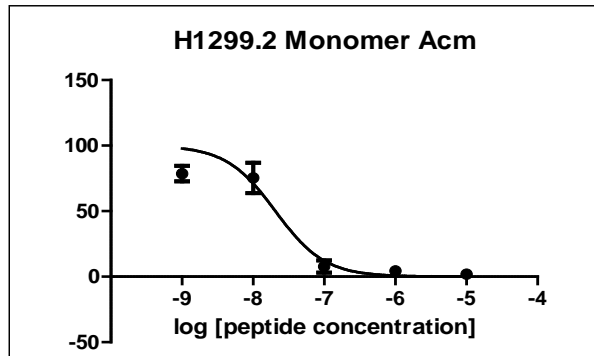

**H1299.2 Tetramer**

|                                                          |                          |
|----------------------------------------------------------|--------------------------|
| log(inhibitor) vs. normalized response -- Variable slope |                          |
| Best-fit values                                          |                          |
| LogIC50                                                  | -9.918                   |
| HillSlope                                                | -0.5365                  |
| IC50                                                     | 1.209E-10                |
| Std. Error                                               |                          |
| LogIC50                                                  | 0.2429                   |
| HillSlope                                                | 0.1706                   |
| 95% Confidence Intervals                                 |                          |
| LogIC50                                                  | -10.43 to -9.407         |
| HillSlope                                                | -0.8950 to -0.1780       |
| IC50                                                     | 3.731e-011 to 3.915e-010 |
| Goodness of Fit                                          |                          |
| Degrees of Freedom                                       | 18                       |
| R square                                                 | 0.6083                   |
| Absolute Sum of Squares                                  | 4960                     |
| Sy.x                                                     | 16.6                     |
| Number of points                                         |                          |
| Analyzed                                                 | 20                       |

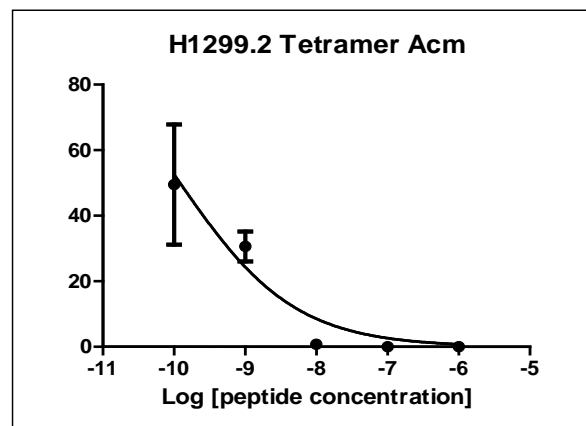

**H2009.1 Monomer**

|                                                          |                          |
|----------------------------------------------------------|--------------------------|
| log(inhibitor) vs. normalized response -- Variable slope |                          |
| Best-fit values                                          |                          |
| LogIC50                                                  | -7.666                   |
| HillSlope                                                | -1.234                   |
| IC50                                                     | 2.158E-08                |
| Std. Error                                               |                          |
| LogIC50                                                  | 0.1829                   |
| HillSlope                                                | 0.4716                   |
| 95% Confidence Intervals                                 |                          |
| LogIC50                                                  | -8.044 to -7.288         |
| HillSlope                                                | -2.210 to -0.2585        |
| IC50                                                     | 9.029e-009 to 5.157e-008 |
| Goodness of Fit                                          |                          |
| Degrees of Freedom                                       | 23                       |
| R square                                                 | 0.7462                   |
| Absolute Sum of Squares                                  | 14061                    |
| Sy.x                                                     | 24.73                    |
| Number of points                                         |                          |
| Analyzed                                                 | 25                       |

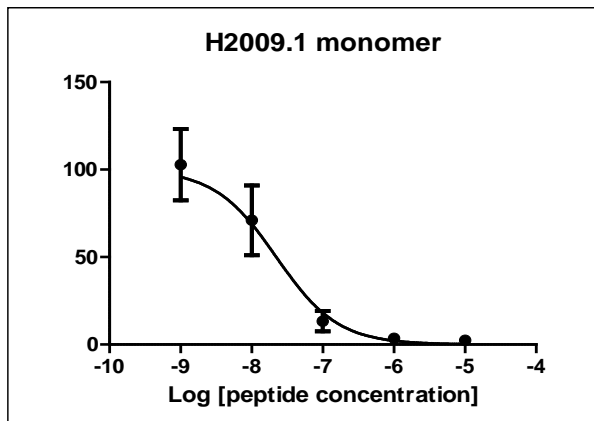

### H2009.1 Tetramer

log(inhibitor) vs. normalized response -- Variable slope

Best-fit values  
LogIC50 -9.463  
HillSlope -0.7789  
IC50 3.441E-10  
Std. Error  
LogIC50 0.09652  
HillSlope 0.1319  
95% Confidence Intervals  
LogIC50 -9.670 to -9.256  
HillSlope -1.062 to -0.4960  
IC50 2.136e-010 to 5.543e-010  
Goodness of Fit  
Degrees of Freedom 14  
R square 0.9018  
Absolute Sum of Squares 1248  
Sy.x 9.443  
Number of points Analyzed 16

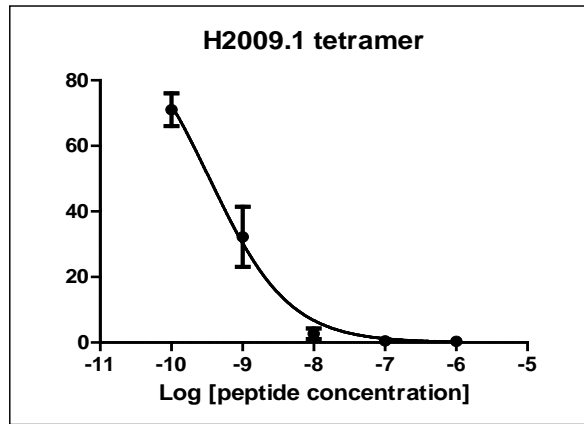

### H1299.1 Monomer

log(inhibitor) vs. normalized response -- Variable slope

Best-fit values  
LogIC50 -5.716  
HillSlope -0.6501  
IC50 0.000001923  
Std. Error  
LogIC50 0.1658  
HillSlope 0.2073  
95% Confidence Intervals  
LogIC50 -6.122 to -5.310  
HillSlope -1.157 to -0.1429  
IC50 7.558e-007 to 4.894e-006  
Goodness of Fit  
Degrees of Freedom 6  
R square 0.7532  
Absolute Sum of Squares 1290  
Sy.x 14.66  
Number of points Analyzed 8

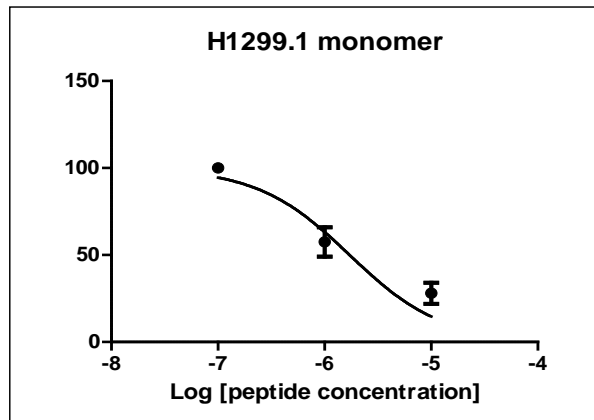

### H1299.1 Tetramer

log(inhibitor) vs. normalized response -- Variable slope

Best-fit values  
LogIC50 -7.377  
HillSlope -1.198  
IC50 4.202E-08  
Std. Error  
LogIC50 0.1019  
HillSlope 0.2685  
95% Confidence Intervals  
LogIC50 -7.604 to -7.149  
HillSlope -1.796 to -0.5995  
IC50 2.491e-008 to 7.088e-008  
Goodness of Fit  
Degrees of Freedom 10  
R square 0.887  
Absolute Sum of Squares 1456  
Sy.x 12.07  
Number of points Analyzed 12

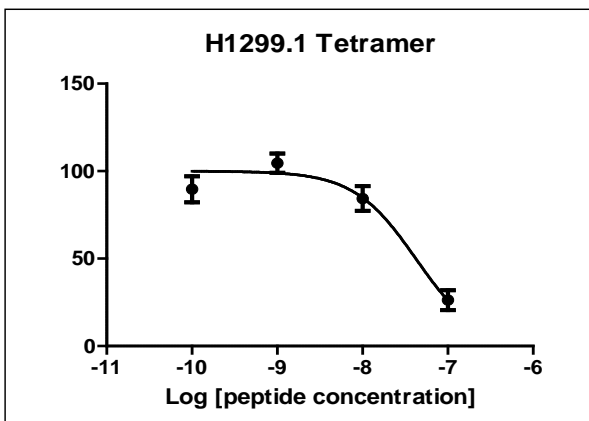

**HCC15.1 Monomer**

log(inhibitor) vs. normalized response

Best-fit values

|                          |                          |
|--------------------------|--------------------------|
| LogIC50                  | -6.409                   |
| IC50                     | 3.897E-07                |
| Std. Error               |                          |
| LogIC50                  | 0.1337                   |
| 95% Confidence Intervals |                          |
| LogIC50                  | -6.693 to -6.126         |
| IC50                     | 2.028e-007 to 7.485e-007 |
| Goodness of Fit          |                          |
| Degrees of Freedom       | 16                       |
| R square                 | 0.6414                   |
| Absolute Sum of Squares  | 7017                     |
| Sy.x                     | 20.94                    |
| Number of points         |                          |
| Analyzed                 | 17                       |

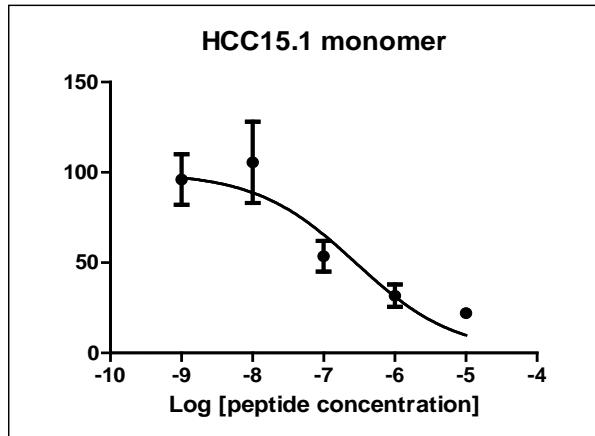

**HCC15.1 Tetramer**

log(inhibitor) vs. normalized response -- Variable slope

Best-fit values

|                          |                          |
|--------------------------|--------------------------|
| LogIC50                  | -11.15                   |
| HillSlope                | -0.3465                  |
| IC50                     | 7.086E-12                |
| Std. Error               |                          |
| LogIC50                  | 0.1964                   |
| HillSlope                | 0.06073                  |
| 95% Confidence Intervals |                          |
| LogIC50                  | -11.57 to -10.73         |
| HillSlope                | -0.4777 to -0.2153       |
| IC50                     | 2.668e-012 to 1.882e-011 |
| Goodness of Fit          |                          |
| Degrees of Freedom       | 13                       |
| R square                 | 0.8525                   |
| Absolute Sum of Squares  | 1220                     |
| Sy.x                     | 9.686                    |
| Number of points         |                          |
| Analyzed                 | 15                       |

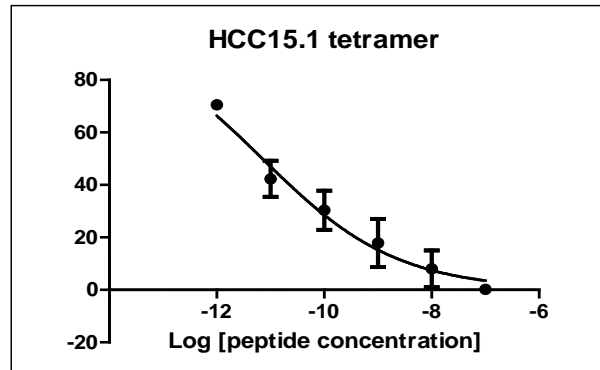

**HCC15.2 Monomer**

Normalized Binding

log(inhibitor) vs. normalized response

Best-fit values

|                          |                          |
|--------------------------|--------------------------|
| LogIC50                  | -7.36                    |
| IC50                     | 4.362E-08                |
| Std. Error               |                          |
| LogIC50                  | 0.1714                   |
| 95% Confidence Intervals |                          |
| LogIC50                  | -7.737 to -6.983         |
| IC50                     | 1.830e-008 to 1.040e-007 |
| Goodness of Fit          |                          |
| Degrees of Freedom       | 11                       |
| R square                 | 0.7055                   |
| Absolute Sum of Squares  | 3564                     |
| Sy.x                     | 18                       |
| Number of points         |                          |
| Analyzed                 | 12                       |

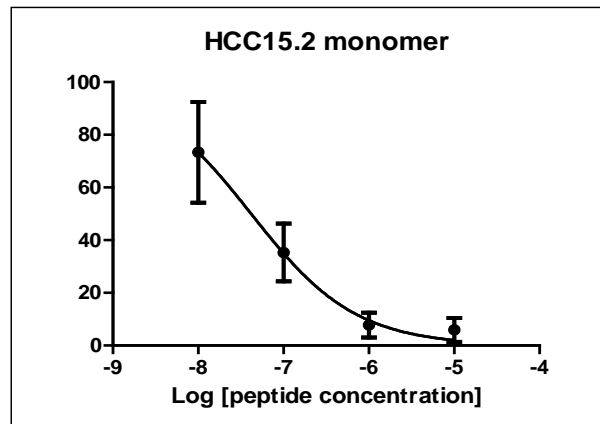

### HCC15.2 Tetramer

log(inhibitor) vs. normalized response

Best-fit values

LogIC50 -7.795

IC50 1.603E-08

Std. Error

LogIC50 0.1056

95% Confidence Intervals

LogIC50 -8.014 to -7.576

IC50 9.680e-009 to 2.654e-008

Goodness of Fit

Degrees of Freedom 22

R square 0.8753

Absolute Sum of Squares 3597

Sy.x 12.79

Number of points

Analyzed 23

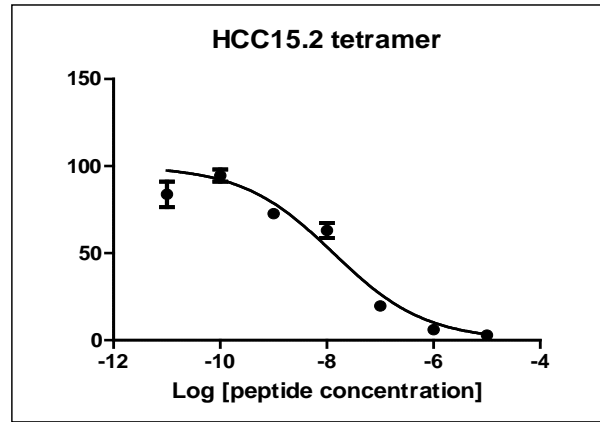

**Table S-IV peptide Cross-Blocking Data**

|                       |               | <b>10-Fold Excess Unlabeled Peptide</b> |             |               |
|-----------------------|---------------|-----------------------------------------|-------------|---------------|
| AF488 Labeled Peptide |               | <b>15.1</b>                             | <b>15.2</b> | <b>1299.2</b> |
|                       | <b>15.1</b>   | <b>0.28</b>                             | 0.7         | 0.56          |
|                       | <b>15.2</b>   | 0.12                                    | <b>0.14</b> | 0.12          |
|                       | <b>1299.2</b> | 0.15                                    | 0.93        | <b>0.11</b>   |

All Data normalized to no competitor peptide

Table S-V Mutational Status of Different Cell Lines

|                                 | EGFR | BRAF | KRAS | NRAS | STK11 (LBK1) | CDKN2A | p53 | PTEN | PIK3CA | RB1 | Cluster | Phenotype |
|---------------------------------|------|------|------|------|--------------|--------|-----|------|--------|-----|---------|-----------|
| Calu-3 (lung AD)                |      |      |      |      |              |        | 1   | 1    |        |     | 1       | E         |
| H1648 (lung AD, lymph node met) |      |      |      |      |              | 1      | 1   |      |        |     | 1       | E         |
| H1993 (lung AD)                 |      |      |      |      | 1            |        | 1   |      |        |     | 1       | E         |
| H2009 (lung AD, lymph node met) |      |      | 1    |      | 1            |        | 1   |      |        | 1   | 1       | E         |
| H2073 (lung AD)                 |      |      |      |      | 1            |        | 1   |      |        | 1   | 1       | M         |
| PC-9 (lung AD)                  | 1    |      |      |      |              | 1      | 1   |      |        |     | 1       | E         |
| H358 (Lung AD/BAC)              |      |      | 1    |      |              |        | 1   |      |        |     | 1       | E         |
| OvaCAR433 (ovarian)             |      |      |      |      |              |        |     |      |        |     | 1       | ND        |
| Calu-1 (lung SQ)                |      |      | 1    |      |              |        | 1   |      |        |     | 2       | M         |
| H1299 (lung LC)                 |      |      |      | 1    |              |        |     |      |        |     | 2       | M         |
| H1355 (lung AD)                 |      |      | 1    |      | 1            |        | 1   |      |        |     | 2       | M         |
| H157 (lung SQ)                  |      |      | 1    |      | 1            | 1      | 1   |      |        |     | 2       | M         |
| H2087 (lung AD, lymph node met) |      | 1    |      | 1    |              |        | 1   |      |        |     | 2       | M         |
| HUH7 (liver)                    |      |      |      |      |              |        | 1   |      |        |     | 2       | ND        |
| MDA-MB-231 (breast)             |      | 1    | 1    |      |              | 1      | 1   | 1    |        |     | 2       | ND        |
| MiaPaCa (pancreatic)            |      |      |      |      |              |        |     |      |        |     | 2       | ND        |
| PC3 (prostate)                  |      |      |      |      |              |        | 1   | 1    |        |     | 2       | ND        |
| SW480 (colon)                   |      |      |      |      |              |        |     |      |        |     | 2       | ND        |
| Panc1 (pancreatic)              |      |      | 1    |      |              | 1      | 1   |      |        |     | 2       | ND        |
| T47D (breast)                   |      |      |      |      |              |        | 1   |      | 1      |     | 2       | ND        |
| H1975 (lung AD)                 | 1    |      |      |      |              | 1      | 1   |      | 1      |     | 4       | E         |
| H1819 (lung AD, lymph node met) |      |      |      |      |              |        | 1   |      |        |     | 4       | E         |
| H441 (lung AD/BAC)              |      |      | 1    |      |              |        | 1   |      |        |     | 4       | E         |
| MDA-MB-468 (breast)             |      |      |      |      |              |        | 1   | 1    | 1      | 1   | 4       | ND        |
| A549 (lung AD)                  |      |      | 1    |      | 1            | 1      |     |      |        |     | 3       | M         |
| H1155 (lung LC)                 |      |      | 1    |      |              |        | 1   | 1    | 1      |     | 3       | M         |
| H1437 (lung AD)                 |      |      |      |      | 1            | 1      | 1   | 1    |        |     | 3       | E         |
| H1666 (lung AD/BAC)             |      | 1    |      |      | 1            | 1      | 1   |      |        |     | 3       | E         |
| H2126 (lung AD)                 |      |      |      |      | 1            | 1      | 1   |      |        |     | 3       | E         |
| H2882 (lung carcinoma)          |      |      |      |      |              |        | 1   |      |        |     | 3       | M         |
| H460 (lung Ad)                  |      |      | 1    |      | 1            | 1      |     |      | 1      |     | 3       | M         |
| HCC15 (lung SQ)                 |      |      |      | 1    | 1            | 1      | 1   |      |        | 1   | 3       | M         |
| HCC2450 (lung SQ)               |      |      |      |      |              |        |     |      | 1      |     | 3       | E         |
| MCF7 (breast)                   |      |      |      |      |              | 1      |     |      | 1      |     | 3       | ND        |
| SCOV3 (ovarian)                 |      |      |      |      |              | 1      | 1   |      | 1      |     | 3       | ND        |

Mutations are noted in red.

|                                         |       |       |        |       |        |        |        |        |        |        |
|-----------------------------------------|-------|-------|--------|-------|--------|--------|--------|--------|--------|--------|
| Total number of samples with mutation   | 2     | 3     | 11     | 3     | 11     | 14     | 26     | 4      | 7      | 4      |
| Percentage of samples with the mutation | 5.71% | 8.57% | 31.43% | 8.57% | 31.43% | 40.00% | 74.29% | 11.43% | 20.00% | 11.43% |
| Total Number of Samples: 35             |       |       |        |       |        |        |        |        |        |        |

|                 |   |   |   |   |   |   |    |   |   |   |
|-----------------|---|---|---|---|---|---|----|---|---|---|
| H2009.1 (12)    | 2 | 0 | 3 | 0 | 3 | 6 | 11 | 1 | 3 | 3 |
| H1299.2 (20)    | 0 | 2 | 7 | 2 | 5 | 5 | 16 | 2 | 1 | 2 |
| HCC15.1 (20)    | 0 | 2 | 7 | 2 | 5 | 5 | 16 | 2 | 1 | 2 |
| HCC15.2 (20)    | 0 | 2 | 7 | 2 | 5 | 5 | 16 | 2 | 1 | 2 |
| No Binders (11) | 0 | 1 | 3 | 1 | 6 | 9 | 6  | 1 | 4 | 1 |
| Group 1 (++++)  | 1 | 0 | 2 | 0 | 3 | 2 | 7  | 0 | 0 | 2 |
| Group 2 (+++)   | 0 | 2 | 5 | 2 | 2 | 3 | 9  | 2 | 1 | 0 |
| Group 3 (----)  | 1 | 0 | 1 | 0 | 0 | 1 | 4  | 1 | 2 | 1 |

Table S-VI Statistical Analysis of Correlations between Mutational Status and peptide Binding

2X2 Tables and Fisher's Exact Tests

| ←← H2009 →→ |           |       |    | ←← H1299.2, HCC15.1, HCC15.2 →→ |         |           |         | Cluster 2 |         |        |           | Cluster 1  |         |         |        | Cluster 3 |           |    |         |           |           |      |        |           |
|-------------|-----------|-------|----|---------------------------------|---------|-----------|---------|-----------|---------|--------|-----------|------------|---------|---------|--------|-----------|-----------|----|---------|-----------|-----------|------|--------|-----------|
|             |           | H2009 |    | p-value                         |         |           | triplet |           | p-value |        |           | cluster 2  |         | p-value |        |           | group 1   |    | p-value |           |           | Null |        | p-value   |
| EGFR        | WT        | 0     | 1  | 0.1109                          | EGFR    | WT        | 0       | 1         | 1.0000  | EGFR   | WT        | 0          | 1       | 0.5956  | EGFR   | WT        | 0         | 1  | 0.3725  | EGFR      | WT        | 0    | 1      | 1.0000    |
|             | Mutant    | 23    | 10 |                                 | Mutant  | 18        | 19      | Mutant    |         | 1      | 1         | Mutant     | 25      |         | 12     | Mutant    | 2         | 0  |         | Mutant    | 30        | 7    | Mutant |           |
|             |           | H2009 |    | 0.5361                          |         |           | triplet |           | 0.6071  |        |           | cluster 2  |         | 0.2191  |        |           | group 1   |    | 1.0000  |           |           | Null |        | 1.0000    |
| BRAF        | WT        | 0     | 1  |                                 | BRAF    | WT        | 18      | 18        |         | BRAF   | WT        | 26         | 10      |         | BRAF   | WT        | 28        | 8  |         | BRAF      | WT        | 25   | 11     |           |
|             | Mutant    | 3     | 0  |                                 | Mutant  | 1         | 2       |           | Mutant  | 1      | 2         |            | Mutant  | 3       | 0      |           | Mutant    | 3  | 0       |           | Mutant    | 2    | 1      |           |
|             |           | H2009 |    | 0.7091                          |         |           | triplet |           | 0.4801  |        |           | cluster 2  |         | 0.2681  |        |           | group 1   |    | 1.0000  |           |           | Null |        | 1.0000    |
| KRAS        | WT        | 0     | 1  |                                 | KRAS    | WT        | 15      | 13        |         | KRAS   | WT        | 21         | 7       |         | KRAS   | WT        | 22        | 6  |         | KRAS      | WT        | 19   | 9      |           |
|             | Mutant    | 8     | 3  |                                 | Mutant  | 4         | 7       |           | Mutant  | 6      | 5         |            | Mutant  | 9       | 2      |           | Mutant    | 9  | 2       |           | Mutant    | 8    | 3      |           |
|             |           | H2009 |    | 0.5361                          |         |           | triplet |           | 0.6071  |        |           | cluster 2  |         | 0.2191  |        |           | group 1   |    | 1.0000  |           |           | Null |        | 1.0000    |
| NRAS        | WT        | 0     | 1  |                                 | NRAS    | WT        | 18      | 18        |         | NRAS   | WT        | 26         | 10      |         | NRAS   | WT        | 28        | 8  |         | NRAS      | WT        | 25   | 11     |           |
|             | Mutant    | 3     | 0  |                                 | Mutant  | 1         | 2       |           | Mutant  | 1      | 2         |            | Mutant  | 3       | 0      |           | Mutant    | 3  | 0       |           | Mutant    | 2    | 1      |           |
|             |           | H2009 |    | 0.7091                          |         |           | triplet |           | 0.7311  |        |           | cluster 2  |         | 0.4463  |        |           | group 1   |    | 0.6632  |           |           | Null |        | 0.0615    |
| STK11       | WT        | 0     | 1  |                                 | STK11   | WT        | 13      | 15        |         | STK11  | WT        | 18         | 10      |         | STK11  | WT        | 23        | 5  |         | STK11     | WT        | 22   | 6      |           |
|             | Mutant    | 8     | 3  |                                 | Mutant  | 6         | 5       |           | Mutant  | 9      | 2         |            | Mutant  | 8       | 3      |           | Mutant    | 8  | 3       |           | Mutant    | 5    | 6      |           |
|             |           | H2009 |    | 0.4769                          |         |           | triplet |           | 0.0104  |        |           | cluster 2  |         | 0.0959  |        |           | group 1   |    | 0.2472  |           |           | Null |        | 0.0346    |
| CDKN2A      | WT        | 0     | 1  |                                 | CDKN2A  | WT        | 6       | 15        |         | CDKN2A | WT        | 12         | 9       |         | CDKN2A | WT        | 15        | 6  |         | CDKN2A    | WT        | 18   | 3      |           |
|             | Mutant    | 8     | 6  |                                 | Mutant  | 13        | 5       |           | Mutant  | 15     | 3         |            | Mutant  | 16      | 2      |           | Mutant    | 16 | 2       |           | Mutant    | 9    | 9      |           |
|             |           | H2009 |    | 0.1211                          |         |           | triplet |           | 0.1871  |        |           | cluster 2  |         | 1.0000  |        |           | group 1   |    | 0.6526  |           |           | Null |        | 0.1018    |
| p53         | WT        | 0     | 1  |                                 | p53     | WT        | 5       | 4         |         | p53    | WT        | 6          | 3       |         | p53    | WT        | 1         | 1  |         | p53       | WT        | 4    | 5      |           |
|             | Mutant    | 15    | 11 |                                 | Mutant  | 14        | 16      |           | Mutant  | 21     | 9         |            | Mutant  | 23      | 7      |           | Mutant    | 23 | 7       |           | Mutant    | 23   | 7      |           |
|             |           | H2009 |    | 1.0000                          |         |           | triplet |           | 1.0000  |        |           | cluster 2  |         | 0.5733  |        |           | group 1   |    | 0.5628  |           |           | Null |        | 1.0000    |
| PTEN        | WT        | 0     | 1  |                                 | PTEN    | WT        | 17      | 18        |         | PTEN   | WT        | 25         | 10      |         | PTEN   | WT        | 27        | 8  |         | PTEN      | WT        | 24   | 11     |           |
|             | Mutant    | 3     | 1  |                                 | Mutant  | 2         | 2       |           | Mutant  | 2      | 2         |            | Mutant  | 4       | 0      |           | Mutant    | 4  | 0       |           | Mutant    | 3    | 1      |           |
|             |           | H2009 |    | 1.0000                          |         |           | triplet |           | 0.0033  |        |           | cluster 2  |         | 0.3938  |        |           | group 1   |    | 0.1683  |           |           | Null |        | 0.1038    |
| PIK3CA      | WT        | 0     | 1  |                                 | PIK3CA  | WT        | 10      | 19        |         | PIK3CA | WT        | 20         | 11      |         | PIK3CA | WT        | 23        | 8  |         | PIK3CA    | WT        | 23   | 7      |           |
|             | Mutant    | 5     | 2  |                                 | Mutant  | 9         | 1       |           | Mutant  | 7      | 1         |            | Mutant  | 8       | 0      |           | Mutant    | 8  | 0       |           | Mutant    | 4    | 5      |           |
|             |           | H2009 |    | 0.1061                          |         |           | triplet |           | 1.0000  |        |           | cluster 2  |         | 0.2916  |        |           | group 1   |    | 0.1803  |           |           | Null |        | 1.0000    |
| RB1         | WT        | 0     | 1  |                                 | RB1     | WT        | 17      | 18        |         | RB1    | WT        | 23         | 12      |         | RB1    | WT        | 29        | 6  |         | RB1       | WT        | 24   | 11     |           |
|             | Mutant    | 22    | 9  |                                 | Mutant  | 2         | 2       |           | Mutant  | 4      | 0         |            | Mutant  | 2       | 2      |           | Mutant    | 2  | 2       |           | Mutant    | 3    | 1      |           |
|             |           | H2009 |    | 0.6399                          |         |           | H1299   |           | 1.0000  |        |           | Null Group |         | 0.6399  |        |           |           |    |         |           |           |      |        |           |
| KRAS        | otherwise | 0     | 1  |                                 | KRAS    | otherwise | 13      | 17        |         | KRAS   | otherwise | 21         | 9       |         | KRAS   | otherwise | 21        | 9  | STK11   | otherwise | 23        | 5    | STK11  | otherwise |
| STK11       | 2 X Mut   | 4     | 1  | STK11                           | 2 X Mut | 2         | 3       | STK11     | 2 X Mut | 3      | 2         | STK11      | 2 X Mut | 3       | 2      | CDKN2     | 2 X Mut   | 1  | 6       | CDKN2     | 2 X Mut   | 1    | 6      |           |
|             |           | H2009 |    | 0.1412                          |         |           | H1299   |           | 1.0000  |        |           | Null Group |         | 0.6399  |        |           |           |    |         |           |           |      |        |           |
| KRAS        | otherwise | 0     | 1  |                                 | KRAS    | otherwise | 13      | 17        |         | KRAS   | otherwise | 21         | 9       |         | KRAS   | otherwise | 21        | 9  | CDKN2   | 2 X Mut   | 1         | 6    | CDKN2  | 2 X Mut   |
| CDKN2       | 2 X Mut   | 5     | 0  | CDKN2                           | 2 X Mut | 2         | 3       | CDKN2     | 2 X Mut | 3      | 2         | CDKN2      | 2 X Mut | 3       | 2      | STK11     | otherwise | 9  | 19      | STK11     | otherwise | 9    | 19     |           |
|             |           | H2009 |    | 0.0695                          |         |           | H1299   |           | 0.0274  |        |           | Null Group |         | 0.0017  |        |           |           |    |         |           |           |      |        |           |
| STK11       | otherwise | 0     | 1  |                                 | STK11   | otherwise | 9       | 19        |         | STK11  | otherwise | 9          | 19      |         | STK11  | otherwise | 9         | 19 | CDKN2   | 2 X Mut   | 6         | 1    | CDKN2  | 2 X Mut   |
| CDKN2       | 2 X Mut   | 7     | 0  | CDKN2                           | 2 X Mut | 6         | 1       | CDKN2     | 2 X Mut | 6      | 1         | CDKN2      | 2 X Mut | 6       | 1      | CDKN2     | 2 X Mut   | 6  | 1       | CDKN2     | 2 X Mut   | 6    | 1      |           |

Table S-VII RPPA Correlation Data

| H2009.1 Analysis                 |                       |                                  |                     |                 |                                                                                                     |
|----------------------------------|-----------------------|----------------------------------|---------------------|-----------------|-----------------------------------------------------------------------------------------------------|
| Marker                           | ttest p value         | FullSerum High.vs.Low.FoldChange | Pearson Correlation | Pearson P value |                                                                                                     |
| pMet_Tyr1234/1235                | 0.000831888           | 26.22884228                      | 0.581864805         | 0.004500447     | Markers with p values < 0.05 are included in the table<br>p values < 0.01 are highlighted in yellow |
| ATR                              | 0.013944487           | 8.144478052                      | 0.570587521         | 0.00555347      |                                                                                                     |
| E Cadherin                       | 0.001049363           | 4.03952645                       | 0.583287481         | 0.004380326     |                                                                                                     |
| Met                              | 0.007218458           | 3.755117416                      | 0.544074815         | 0.008854727     |                                                                                                     |
| STAT5_pY694                      | 0.0003967             | 3.142244909                      | 0.714167552         | 0.000189006     |                                                                                                     |
| EGFR_pY1173                      | 0.002363457           | 3.139161137                      | 0.580030013         | 0.004659411     |                                                                                                     |
| pAxl Y779                        | 0.012085971           | 2.914584473                      | 0.560394064         | 0.006674249     |                                                                                                     |
| STAT6_pY641                      | 0.007460998           | 2.728949329                      | 0.551371743         | 0.00781674      |                                                                                                     |
| beta-Catenin                     | 0.005461583           | 2.336955152                      | 0.446872546         | 0.037066428     |                                                                                                     |
| Her2_pY1248                      | 0.001064712           | 2.208096008                      | 0.606850653         | 0.002747734     |                                                                                                     |
| MACC1                            | 0.005369179           | 1.894460728                      | 0.462996203         | 0.030012015     |                                                                                                     |
| Src_pY416                        | 0.02574993            | 1.80260343                       | 0.48998129          | 0.020621459     |                                                                                                     |
| STAT3_pY705-2                    | 0.015883992           | 1.757080299                      | 0.529403496         | 0.011286194     |                                                                                                     |
| STAT3_pY705-1                    | 0.041953767           | 1.618057612                      | 0.550791596         | 0.007895406     |                                                                                                     |
| N Cadherin                       | 0.001851895           | -1.168381738                     | -0.658269446        | 0.000866922     |                                                                                                     |
| TAZ.1                            | 0.028214489           | -1.180086868                     | -0.548418902        | 0.008223966     |                                                                                                     |
| Stathamin                        | 0.03220062            | -1.424910793                     | -0.377902069        | 0.082913829     |                                                                                                     |
| RAD50                            | 0.028171093           | -1.596260352                     | -0.470027588        | 0.027290357     |                                                                                                     |
| Thymidylate synthase             | 0.017338785           | -1.644269789                     | -0.49379446         | 0.019510745     |                                                                                                     |
| H1299.2/HCC15.1/HCC15.2 Analysis |                       |                                  |                     |                 |                                                                                                     |
| Marker                           | FullSerum ttestpvalue | FullSerum High.vs.Low.FoldChange | Pearson Correlation | Pearson P value |                                                                                                     |
| p16                              | 0.013559309           | 2.031347507                      | 0.382171631         | 0.079217822     |                                                                                                     |
| XIAP                             | 0.020023271           | -1.185240268                     | -0.549366751        | 0.008091386     |                                                                                                     |
| VASP                             | 0.004237199           | 1.429702674                      | 0.415426389         | 0.054516309     |                                                                                                     |
| PDK1_pS241                       | 0.047194833           | -1.230937203                     | -0.366630969        | 0.093288979     |                                                                                                     |
| Caspase 7                        | 0.013390989           | -1.323391571                     | -0.577621644        | 0.004875154     |                                                                                                     |



Table S-VIII NIR Imaging Raw Data

| H2009.1 |         | 2009 tumor              | 460 tumor | liver            | lung   | spleen              |       | H2009 tumor/ H460 tumor |       | H2009 tumor/liver  | H2009 tumor/lung | H2009 tumor/spleen | H460/liver | H460/lung    | H460/spleen |
|---------|---------|-------------------------|-----------|------------------|--------|---------------------|-------|-------------------------|-------|--------------------|------------------|--------------------|------------|--------------|-------------|
| 30 µg   | Mouse 1 | 1810                    | 37        | 7800             | 75     | 50.20               | 50.20 | 49.5                    | 0.2   | 24.0               | 36.1             | 0.005              | 0.49       | 0.73         |             |
| 30 µg   | Mouse 2 | 17300                   | 428       | 10500            | 2270   | Below detection lim |       | 40.4                    | 1.6   | 7.6                |                  | 0.041              | 0.19       |              |             |
| 30 µg   | Mouse 3 | 9300                    | 433       | 7580             | 48     | 26.20               |       | 21.5                    | 1.2   | 192.9              | 355.0            | 0.057              | 8.98       | 16.53        |             |
| 30 µg   | Mouse 4 | 7970                    | 384       | 5590             | 177    | 2.13                |       | 20.8                    | 1.4   | 45.0               | 3741.8           | 0.069              | 2.17       | 180.28       |             |
| 30 µg   | Mouse 5 | 13600                   | 112       | 9310             | 129    | 18.30               |       | 121.4                   | 1.5   | 105.4              | 743.2            | 0.012              | 0.87       | 6.12         |             |
|         | average | 9996                    | 279       | 8156             | 540    | 24.21               |       | 50.7                    | 1.2   | 75.0               | 1219.0           | 0.037              | 2.54       | 50.91        |             |
|         | SEM     | 2626                    | 85        | 833              | 433    | 10                  |       | 19                      | 0.25  | 34                 | 853              | 0.012              | 1.65       | 43.25        |             |
| H1299.2 |         | 1299 tumor              | 460 tumor | liver            | lung   | spleen              |       | H1299 tumor/ H460 tumor |       | H1299 tumor/liver  | H1299 tumor/lung | H2009 tumor/spleen | H460/liver | H460/lung    | H460/spleen |
| 53 µg   | Mouse 1 | 8200                    | 4165      | 41               | 3050   | below detection     |       | 2.0                     | 200.2 | 2.7                |                  |                    | 101.71     | 1.37         |             |
| 53 µg   | Mouse 2 | 2355                    | 618       | 310.70           | 4685   | 84.60               |       | 3.8                     | 7.6   | 0.5                | 27.8             | 1.99               | 0.13       | 7.30         |             |
| 53 µg   | Mouse 3 | 9710                    | 2070      | 652              | 1475   | 146                 |       | 4.7                     | 14.9  | 6.6                | 66.7             | 3.18               | 1.40       | 14.23        |             |
|         | average | 6755                    | 2284      | 334              | 3070   | 115.05              |       | 3.5                     | 74.2  | 3.3                | 47.3             | 35.62              | 0.97       | 10.76        |             |
|         | SEM     | 2242.77                 | 1783.42   | 305.96           | 926.70 | 30.45               |       | 0.80                    | 63.04 | 1.78               |                  | 33.04              | 0.42       |              |             |
| 15.1    |         | 1299 tumor              | 460 tumor | liver            | lung   | spleen              |       | H1299 tumor/ H460 tumor |       | H 1299 tumor/liver | H1299 tumor/lung | H1299 tumor/spleen | H460/Liver | H460/Lung    | H460/spleen |
| 43 µg   | Mouse 1 | 2410                    | 503       | 6570             | 432    | 12.64               |       | 4.8                     | 0.4   | 5.6                | 190.7            | 0.08               | 1.16       | 39.81        |             |
| 43 µg   | Mouse 2 | 2030                    | 572       | 4025             | 270    | below detection     |       | 3.6                     | 0.5   | 7.5                |                  | 0.14               | 2.12       |              |             |
| 63 µg   | Mouse 3 | 1013                    | 688       | 2435             | 741    | 68.20               |       | 1.5                     | 0.4   | 1.4                | 14.9             | 0.28               | 0.93       | 10.08        |             |
|         | average | 1818                    | 587       | 4343             | 277.61 |                     |       | 3.3                     | 0.4   | 4.8                | 102.8            | 0.17               | 1.40       | 24.95        |             |
|         | SEM     | 417.05                  | 53.85     | 1204.24          | 138.28 |                     |       | 0.97                    | 0.04  | 1.82               |                  | 0.06               | 0.36       |              |             |
| H460.1  |         | H460 tumor/ H1299 tumor |           | H460 tumor/liver |        | H460 tumor/lung     |       | H460 tumor/spleen       |       | H1299/Liver        |                  | H1299/lung         |            | H1299/spleen |             |
| 44 µg   | Mouse 1 | 169                     | 1425      | 1480             | 94     | 16.0                |       | 8.4                     | 1.0   | 15.1               | 89.3             | 0.11               | 1.79       | 10.60        |             |
| 44 µg   | Mouse 2 | no tumor                | 1605      | 1245             | 96     | 64.6                |       |                         | 1.3   | 24.9               |                  |                    |            |              |             |
| 89 µg   | Mouse 3 | 105                     | 4865      | 3380             | 1945   | 63.9                |       | 46.3                    | 1.4   | 2.5                | 76.1             | 0.03               | 0.05       | 1.64         |             |
|         | average | 137                     | 2632      | 2035             | 712    | 48.1                |       | 27.4                    | 1.2   | 14.2               | 63.4             | 0.07               | 0.92       | 6.12         |             |
|         | SEM     |                         | 1117.87   | 675.91           | 616.65 | 16.09               |       |                         | 0.14  | 6.47               | 19.66            |                    |            |              |             |
| 15.2    |         | H1299 tumor/ H460 tumor |           | tumor/liver      |        | tumor/lung          |       | tumor/spleen            |       |                    |                  |                    |            |              |             |
| 33 µg   | Mouse 1 | 1013                    | 688       | 2435             | 741    | 68.20               |       | 1.5                     | 0.4   | 1.4                | 14.9             |                    |            |              |             |
